# FOCUS

THE JOURNAL OF LIFELONG LEARNING IN PSYCHIATRY



## *Substance Abuse: Diagnosis and Treatment*

*Guest Editor, Marc Galanter, M.D.*

### IN CLINICAL SYNTHESIS:

Clinical Advances in Pharmacological  
and Integrated Treatment Approaches for  
Alcohol and Drug Use Disorders

*Helen Dermatis, Ph.D., Marc Galanter, M.D.*

### IN REVIEW:

Preclinical Development and Clinical Implementation of  
Treatments for Substance Abuse Disorders

*Robert N. Pechnick, Ph.D., et al.*

AND INFLUENTIAL PUBLICATIONS . . .
